# Supplementary material for: The CNS relapse in T-cell lymphoma index predicts CNS relapse in patients with T- and NK-cell lymphomas
Source: PubMed Central journal article supplement — Blood Adv. 2024 May 15;8(13):3507–18. doi: 10.1182/bloodadvances.2024012800 (PMC11261035; doi:10.1182/bloodadvances.2024012800), 2024-05-15
Supplement: BLOODA_ADV-2024-012800-mmc1.pdf [file BLOODA_ADV-2024-012800-mmc1.pdf]

## **The CNS Relapse in T-Cell Lymphoma Index Predicts CNS Relapse in Patients with T- and NK-Cell Lymphomas**

### **Supplementary data:**

- I. Supplementary Table S1: Contribution of cases by institution to CNS relapse cohort
- II. Supplementary Table S2: Characteristics of CNS relapse in CNS relapse cohort
- III. Supplementary Table S3: Frontline treatment for CNS relapse cohort
- IV. Supplementary Table S4: Treatment of CNS relapse in CNS relapse cohort
- V. Supplementary Table S5: Baseline characteristics for patients in training and validation sets with missing data
- VI. Supplementary Table S6: Frontline treatment in training and validation sets
- VII. Supplementary Table S7: Multivariate analysis of treatment modifications for training set patients
- VIII. Supplementary Table S8: Multivariate analysis of treatment modifications for high-risk training set patients
- IX. Supplementary Table S9: Multivariate analysis of treatment modifications for training set patients who had CR1 after completion of frontline therapy
- X. Supplementary Table S10: Multivariate analysis of treatment modifications for high-risk training set patients who had CR1 after completion of frontline therapy

**Supplementary Table S1. Contribution of cases by institution to CNS relapse cohort.**

| <b>Institution</b>                                      | <b>Final cases included for review</b> |
|---------------------------------------------------------|----------------------------------------|
| Memorial Sloan Kettering Cancer Center                  | 36                                     |
| University of Pennsylvania                              | 12                                     |
| Mayo Clinic                                             | 11                                     |
| H. Lee Moffitt Cancer Center and Research Institute     | 10                                     |
| Washington University in St. Louis                      | 9                                      |
| Winship Cancer Institute at Emory University            | 6                                      |
| City of Hope                                            | 8                                      |
| The Ohio State University Comprehensive Cancer Center   | 7                                      |
| Brown University                                        | 6                                      |
| University of Texas MD Anderson Cancer Center           | 6                                      |
| Thomas Jefferson University                             | 6                                      |
| Atrium Health/Levine Cancer Institute                   | 3                                      |
| University of Colorado Cancer Center                    | 3                                      |
| University of Chicago                                   | 3                                      |
| Roswell Park Comprehensive Cancer Center                | 2                                      |
| University of California San Diego Moores Cancer Center | 2                                      |
| Cleveland Clinic                                        | 2                                      |
| University of Minnesota                                 | 2                                      |
| Northwell Health Cancer Institute                       | 1                                      |
| <b>Total</b>                                            | <b>135</b>                             |

**Supplementary Table S2. Characteristics of CNS relapse in CNS relapse cohort.**

| <b>CNS relapse characteristics (N=135)</b>                   |              |
|--------------------------------------------------------------|--------------|
|                                                              | <b>N (%)</b> |
| <b>Systemic relapse/progression prior to CNS involvement</b> |              |
| Yes                                                          | 60 (44)      |
| No                                                           | 75 (56)      |
| <b>Concurrent CNS and systemic disease</b>                   |              |
| Yes                                                          | 92 (68)      |
| No                                                           | 43 (32)      |
| <b>CNS symptoms</b>                                          |              |
| Yes                                                          | 97 (72)      |
| No                                                           | 28 (21)      |
| Missing                                                      | 10 (7)       |
| <b>Method of CNS detection</b>                               |              |
| Radiographic only                                            | 20 (15)      |
| Flow cytometry/Cytology/Biopsy                               | 54 (40)      |
| Both                                                         | 61 (45)      |
| <b>Pattern of CNS Relapse</b>                                |              |
| Leptomeningeal                                               | 70 (52)      |
| Parenchymal                                                  | 38 (28)      |
| Mixed                                                        | 25 (19)      |
| Missing                                                      | 2 (1)        |
| <b>Cause of death</b>                                        |              |
| Systemic lymphoma                                            | 26 (26)      |
| CNS lymphoma                                                 | 16 (16)      |
| Both CNS/systemic lymphoma                                   | 36 (36)      |
| Treatment-related                                            | 4 (4)        |
| Other/Unknown                                                | 19 (19)      |

**Supplementary Table S3. Frontline treatment for CNS relapse cohort.**

| <b>Treatment characteristics (N=135)</b>         |                       |
|--------------------------------------------------|-----------------------|
|                                                  | <b>Median (range)</b> |
| <b>Lines of therapy prior to CNS relapse</b>     | 1 (1-7)               |
|                                                  | <b>N (%)</b>          |
| <b>Response to frontline therapy<sup>2</sup></b> |                       |
| CR                                               | 49 (36)               |
| PR                                               | 32 (24)               |
| SD                                               | 4 (3)                 |
| PD                                               | 39 (29)               |
| NE                                               | 2 (1)                 |
| Missing                                          | 9 (7)                 |
| <b>CR ever achieved prior to CNS relapse</b>     |                       |
| Yes                                              | 64 (47)               |
| No                                               | 61 (45)               |
| NE                                               | 1 (1)                 |
| Missing                                          | 9 (7)                 |
| <b>Frontline regimens<sup>3</sup></b>            |                       |
| CHOP alone                                       | 35 (26)               |
| CHOEP/EPOCH alone                                | 38 (28)               |
| CHOP + Duvelisib                                 | 1 (1)                 |
| CHOP + Belinostat                                | 1 (1)                 |
| CHO(E)P + Lenalidomide                           | 6 (4)                 |
| EPOCH + Nivolumab                                | 1 (1)                 |
| BV-CH(E)P                                        | 7 (5)                 |
| HyperCVAD + MTX/AraC                             | 6 (4)                 |
| (m)SMILE                                         | 6 (4)                 |
| Newcastle regimen                                | 3 (2)                 |
| Platinum-based intensive chemotherapy            | 6 (4)                 |
| Alemtuzumab-based regimen                        | 3 (2)                 |
| AZT/IF                                           | 3 (2)                 |
| Romidepsin                                       | 1 (1)                 |
| Bexarotene-based therapy                         | 2 (1)                 |
| Steroids                                         | 3 (2)                 |
| Other non-intensive therapy                      | 3 (2)                 |
| Skin-based therapy for MF                        | 9 (7)                 |
| Observation                                      | 3 (2)                 |
| Radiation (excl. TSEB)                           | 9 (7)                 |
| Surgery                                          | 1 (1)                 |
| Use of frontline anthracycline                   | 94 (70)               |
| Use of frontline BV                              | 7 (5)                 |
| Use of frontline etoposide                       | 51 (38)               |
| Use of frontline oral targeted agent             | 9 (7)                 |
| <b>Frontline CNS prophylaxis</b>                 |                       |
| Yes, IT MTX and/or AraC                          | 16 (12)               |
| Yes, HD-MTX                                      | 4 (3)                 |
| Yes, combined                                    | 1 (1)                 |
| No                                               | 113 (84)              |
| Missing                                          | 1 (1)                 |
| <b>HCT in CR<sup>1</sup></b>                     |                       |

|                                                          |          |
|----------------------------------------------------------|----------|
| AHCT                                                     | 12 (24)  |
| AlloHCT                                                  | 7 (14)   |
| None                                                     | 30 (61)  |
| <b>HCT at any point prior to CNS relapse<sup>1</sup></b> |          |
| AHCT                                                     | 14 (10)  |
| AlloHCT                                                  | 11 (8)   |
| None                                                     | 110 (81) |

<sup>1</sup>All patients who underwent AHCT in CR1 received BEAM (carmustine, etoposide, cytarabine, melphalan) for conditioning; conditioning with total body irradiation was most commonly used for those undergoing frontline consolidative alloHCT (N=5) with 2 patients of these patients receiving a thiotepa-containing regimen.

<sup>2</sup>Assessed per institutional guidelines

<sup>3</sup>CHOP: cyclophosphamide, doxorubicin, vincristine, prednisone; CHOEP/EPOCH: etoposide, cyclophosphamide, doxorubicin, vincristine, prednisone; BV-CH(E)P: brentuximab vedotin, cyclophosphamide, doxorubicin, prednisone +/- etoposide; HyperCVAD: hyperfractionated cyclophosphamide, vincristine, doxorubicin, dexamethasone; SMILE: dexamethasone, methotrexate, ifosfamide, l-asparaginase, etoposide; mSMILE: SMILE modified with peg-asparaginase; Newcastle regimen: CHOP followed by ifosfamide, vincristine, etoposide/methotrexate; AZT/IF: zidovudine/interferon-based regimens; TSEB: total skin electron beam  
Abbreviations: CR, complete response; PR, partial response; SD, stable disease; PD, progressive disease; NE, not evaluable; HCT, hematopoietic stem cell transplant

**Supplementary Table S4. Treatment of CNS relapse in CNS relapse cohort.**

| <b>Treatment characteristics (N=135)</b>                |              |
|---------------------------------------------------------|--------------|
|                                                         | <b>N (%)</b> |
| <b>Initial CNS-directed treatment after CNS relapse</b> |              |
| IT therapy +/- systemic therapy                         | 45 (33)      |
| HD-MTX +/- systemic therapy                             | 34 (25)      |
| Combined IT/HD-MTX therapy +/- systemic therapy         | 32 (24)      |
| Other systemic chemotherapy                             | 4 (3)        |
| Radiation                                               | 15 (11)      |
| Supportive care only                                    | 14 (10)      |
| Targeted agent                                          | 10 (7)       |
| ICI                                                     | 1 (1)        |
| Mogamulizumab                                           | 3 (2)        |
| BV                                                      | 3 (2)        |
| <b>Best response after CNS relapse<sup>1</sup></b>      |              |
| CR                                                      | 29 (21)      |
| PR                                                      | 20 (15)      |
| SD                                                      | 13 (23)      |
| PD                                                      | 31 (23)      |
| NE <sup>2</sup>                                         | 42 (31)      |

<sup>1</sup>Assessed per institutional guidelines

<sup>2</sup>Not evaluable due to lack of repeat CNS assessment, death, and/or transition to hospice  
 Abbreviations: ICI, immune checkpoint inhibitor; BV, brentuximab vedotin; CR, complete response; PR, partial response; SD, stable disease; PD, progressive disease; NE, not evaluable

**Supplementary Table S5. Baseline characteristics for patients in training and validation sets with missing data.**

| Baseline Characteristics            | Training set              |                              | P-value | Training set (N=226) | Validation set (N=745) | P-value |
|-------------------------------------|---------------------------|------------------------------|---------|----------------------|------------------------|---------|
|                                     | CNS relapse cohort (N=91) | UPenn control cohort (N=135) |         |                      |                        |         |
|                                     | Median (range)            |                              |         | Median (range)       |                        |         |
| <b>Age, years</b>                   | 62 (24-81)                | 59 (20-85)                   | 0.507   | 60 (20-85)           | 67 (18-96)             | <0.001  |
| <b>Age</b>                          | N (%)                     |                              |         | N (%)                |                        |         |
| >60 years                           | 47 (52)                   | 65 (48)                      | 0.588   | 112 (50)             | 510 (68)               | <0.001  |
| ≤60 years                           | 43 (47)                   | 70 (52)                      |         | 113 (50)             | 235 (32)               |         |
| Missing                             | 1 (1)                     | 0 (0)                        |         | 1 (0)                | 0 (0)                  |         |
| <b>Sex</b>                          |                           |                              |         |                      |                        |         |
| Male                                | 52 (57)                   | 73 (54)                      | 0.684   | 125 (55)             | 440 (59)               | 0.318   |
| Female                              | 39 (43)                   | 62 (46)                      |         | 101 (45)             | 305 (41)               |         |
| <b>MTNKN histology</b>              |                           |                              |         |                      |                        |         |
| PTCL, NOS                           | 34 (37)                   | 18 (13)                      | <0.001  | 52 (23)              | 252 (34)               | 0.002   |
| TFH-TCL (incl. AITL)                | 20 (22)                   | 33 (24)                      | 0.750   | 53 (23)              | 104 (14)               | 0.001   |
| ALCL, ALK+                          | 1 (1)                     | 18 (13)                      | 0.001   | 19 (8)               | 68 (9)                 | 0.792   |
| ALCL, ALK-                          | 18 (20)                   | 23 (17)                      | 0.602   | 41 (18)              | 115 (15)               | 0.352   |
| ALCL, ALKu                          | 0 (0)                     | 0 (0)                        | 1.000   | 0 (0)                | 36 (5)                 | <0.001  |
| ENKTL                               | 7 (8)                     | 15 (11)                      | 0.495   | 22 (10)              | 31 (4)                 | 0.002   |
| SPTCL (includes SPTCL and PCGD-TCL) | 2 (2)                     | 13 (10)                      | 0.030   | 15 (7)               | 12 (2)                 | <0.001  |
| EATL (includes EATL and MEITL)      | 7 (8)                     | 5 (4)                        | 0.232   | 12 (5)               | 68 (9)                 | 0.073   |
| HSTCL                               | 2 (2)                     | 6 (4)                        | 0.480   | 8 (4)                | 8 (1)                  | 0.017   |
| TCL UNS                             | 0 (0)                     | 0 (0)                        | 1.000   | 0 (0)                | 51 (7)                 | <0.001  |
| ALCL, BIA                           | 0 (0)                     | 4 (3)                        | 0.150   | 4 (2)                | 0 (0)                  | 0.003   |
| <b>ECOG PS</b>                      |                           |                              | 1.000   |                      |                        | <0.001  |
| 2-4                                 | 16 (18)                   | 28 (21)                      |         | 44 (19)              | 262 (35)               |         |
| 0-1                                 | 62 (68)                   | 106 (79)                     |         | 168 (74)             | 483 (65)               |         |
| Missing                             | 13 (14)                   | 1 (1)                        |         | 14 (6)               | 0 (0)                  |         |
| <b>Elevated LDH</b>                 |                           |                              | 0.232   |                      |                        | 0.740   |
| Yes                                 | 49 (54)                   | 67 (50)                      |         | 116 (51)             | 434 (58)               |         |
| No                                  | 26 (29)                   | 52 (39)                      |         | 78 (35)              | 275 (37)               |         |
| Missing                             | 16 (18)                   | 16 (12)                      |         | 32 (14)              | 36 (5)                 |         |

|                                                 |         |          |        |          |          |        |
|-------------------------------------------------|---------|----------|--------|----------|----------|--------|
| <b>Ann Arbor Stage</b>                          |         |          | 0.006  |          |          | 0.139  |
| III or IV                                       | 72 (79) | 88 (65)  |        | 160 (71) | 480 (64) |        |
| I or II                                         | 15 (16) | 47 (35)  |        | 62 (27)  | 242 (33) |        |
| Missing                                         | 4 (4)   | 0 (0)    |        | 4 (2)    | 23 (3)   |        |
| <b>B-symptoms</b>                               |         |          | 0.580  |          |          | <0.001 |
| Yes                                             | 42 (46) | 58 (43)  |        | 100 (44) | 441 (59) |        |
| No                                              | 45 (49) | 75 (56)  |        | 120 (53) | 282 (38) |        |
| Missing                                         | 4 (4)   | 2 (1)    |        | 6 (3)    | 22 (3)   |        |
| <b>Site of EN involvement (excl. BM/PB)</b>     |         |          |        |          |          |        |
| None                                            | 30 (33) | 61 (45)  | 0.097  | 91 (40)  | 303 (41) | 0.816  |
| Liver                                           | 9 (10)  | 6 (4)    | 0.108  | 15 (7)   | 36 (5)   | 0.312  |
| GI tract                                        | 14 (15) | 11 (8)   | 0.086  | 25 (11)  | 110 (15) | 0.155  |
| GU tract                                        | 3 (3)   | 2 (1)    | 0.388  | 5 (2)    | 1 (1)    | 0.003  |
| Breast                                          | 2 (2)   | 4 (3)    | 1.000  | 6 (3)    | 2 (0.5)  | 0.003  |
| Testicles                                       | 1 (1)   | 2 (1)    | 1.000  | 3 (1)    | 5 (1)    | 0.402  |
| Skin                                            | 16 (18) | 20 (15)  | 0.579  | 36 (16)  | 53 (7)   | <0.001 |
| Bone                                            | 11 (12) | 13 (10)  | 0.517  | 24 (11)  | 28 (4)   | <0.001 |
| Other                                           | 5 (5)   | 1 (1)    | 0.038  | 6 (3)    | 36 (5)   | 0.192  |
| Lung                                            | 16 (18) | 17 (13)  | 0.336  | 33 (15)  | 42 (6)   | <0.001 |
| Soft tissue                                     | 11 (12) | 8 (6)    | 0.140  | 19 (8)   | 20 (3)   | 0.001  |
| Sinus                                           | 5 (5)   | 7 (5)    | 1.000  | 12 (5)   | 11 (2)   | 0.002  |
| Pleura                                          | 2 (2)   | 2 (1)    | 0.651  | 4 (2)    | 37 (5)   | 0.037  |
| Peritoneum                                      | 3 (3)   | 0 (0)    | 0.061  | 3 (1)    | 11 (2)   | 1.000  |
| Missing                                         | 2 (2)   | 0 (0)    |        | 2 (1)    | 20 (3)   |        |
| <b>BM/PB involvement</b>                        |         |          | <0.001 |          |          | 0.005  |
| Yes                                             | 40 (44) | 24 (18)  |        | 64 (28)  | 153 (20) |        |
| No                                              | 43 (47) | 108 (80) |        | 151 (67) | 592 (80) |        |
| Missing                                         | 8 (9)   | 3 (2)    |        | 11 (5)   | 0 (0)    |        |
| <b>≥2 sites of EN involvement (incl. BM/PB)</b> |         |          | <0.001 |          |          | <0.001 |
| Yes                                             | 40 (44) | 23 (17)  |        | 63 (28)  | 103 (14) |        |
| No                                              | 50 (55) | 112 (83) |        | 162 (72) | 620 (83) |        |
| Missing                                         | 1 (1)   | 0 (0)    |        | 1 (0)    | 22 (3)   |        |



| <b>IPI score</b> |         |         |       |          |          |       |
|------------------|---------|---------|-------|----------|----------|-------|
| 0-1              | 17 (19) | 49 (36) | 0.005 | 66 (29)  | 172 (23) | 0.221 |
| 2-3              | 60 (66) | 67 (50) | 0.020 | 127 (56) | 382 (51) | 0.818 |
| 4-5              | 14 (15) | 19 (14) | 0.848 | 33 (15)  | 137 (18) | 0.093 |
| Missing          | 0 (0)   | 0 (0)   |       | 0 (0)    | 54 (7)   |       |

Abbreviations: ALCL, anaplastic large cell lymphoma; ALKu, ALK status unknown; BIA, breast implant associated; SPTCL, subcutaneous panniculitis-like T-cell lymphoma; PCGD-TCL, primary cutaneous gamma-delta T-cell lymphoma; HSTCL, hepatosplenic T-cell lymphoma; TCL, T-cell lymphoma; UNS, unspecified; ENKTL, extranodal NK/T-cell lymphoma; EATL, enteropathy-associated T-cell lymphoma; MEITL, monomorphic epitheliotropic intestinal T-cell lymphoma; TFH-TCL, T-follicular helper T-cell lymphoma; AITL, angioimmunoblastic T-cell lymphoma; PTCL, NOS, peripheral T-cell lymphoma, not otherwise specified; PS, performance status; LDH, lactate dehydrogenase; EN, extranodal; GI, gastrointestinal; GU, genitourinary; BM/PB, bone marrow/peripheral blood; IPI, International Prognostication Index

**Supplementary Table S6. Frontline treatment in training and validation sets.**

| Treatment modifications                       | Training set              |                              |                | Training set<br>(N=226) | Validation set (N=745) |                |
|-----------------------------------------------|---------------------------|------------------------------|----------------|-------------------------|------------------------|----------------|
|                                               | CNS relapse cohort (N=91) | UPenn control cohort (N=135) |                |                         |                        |                |
| <b>Initial treatment<sup>1</sup></b>          | <b>N (%)</b>              |                              | <b>P-value</b> | <b>N (%)</b>            |                        | <b>P-value</b> |
| CHOP                                          | 39 (43)                   | 58 (43)                      | 1.000          | 97 (43)                 | 342 (46)               | 0.446          |
| CHOEP/EPOCH                                   | 26 (29)                   | 24 (18)                      | 0.072          | 50 (22)                 | 157 (21)               | 0.781          |
| Intensive treatment other than CHO(E)P /EPOCH | 17 (19)                   | 21 (16)                      | 0.588          | 38 (17)                 | 42 (6)                 | <0.001         |
| Palliative therapy                            | 9 (10)                    | 21 (16)                      | 0.238          | 30 (13)                 | 48 (6)                 | 0.002          |
| Radiation only                                | 0 (0)                     | 9 (7)                        | 0.012          | 9 (4)                   | 15 (2)                 | 0.138          |
| No therapy                                    | 0 (0)                     | 2 (1)                        | 0.517          | 2 (1)                   | 61 (8)                 | <0.001         |
| <b>Use of etoposide with initial therapy</b>  |                           |                              | 0.003          |                         |                        | 0.008          |
| Yes                                           | 43 (47)                   | 37 (27)                      |                | 80 (35)                 | 182 (24)               |                |
| No                                            | 48 (53)                   | 98 (73)                      |                | 146 (65)                | 518 (74)               |                |
| Missing                                       | 0 (0)                     | 0 (0)                        |                | 0 (0)                   | 45 (6)                 |                |
| <b>CNS prophylaxis</b>                        |                           |                              | 0.107          |                         |                        | 0.012          |
| Yes                                           | 12 (13)                   | 9 (7)                        |                | 21 (9)                  | 113 (15)               |                |
| No                                            | 79 (87)                   | 126 (93)                     |                | 205 (91)                | 587 (84)               |                |
| <b>HCT type in CR1</b>                        |                           |                              | 0.313          |                         |                        | 0.140          |
| AHCT                                          | 11 (12)                   | 26 (19)                      |                | 37 (16)                 | 105 (14)               |                |
| AlloHCT                                       | 3 (3)                     | 2 (1)                        |                | 5 (2)                   | 5 (1)                  |                |

<sup>1</sup>CHOP: cyclophosphamide, doxorubicin, vincristine, prednisone; CHOEP/EPOCH: etoposide, cyclophosphamide, doxorubicin, vincristine, prednisone

**Supplementary Table S7. Multivariate analysis of treatment modifications for training set patients (N=182).**

| Variable                                 | Hazard Ratio (95% CI) | P-Value |
|------------------------------------------|-----------------------|---------|
| MTNKN Histology:                         |                       |         |
| PTCL, NOS                                | 2.75 (1.47-5.17)      | 0.002   |
| ALCL, ALK+                               | 0.11 (0.01-0.83)      | 0.032   |
| EATL (includes EATL and MEITL)           | 2.90 (0.89 -9.41)     | 0.077   |
| SPTCL (includes SPTCL and PCGD-TCL)      | 0.97 (0.20-4.67)      | 0.974   |
| Elevated LDH                             | 1.10 (0.57-2.11)      | 0.775   |
| Stage ≥III                               | 1.27 (0.60-2.73)      | 0.532   |
| B-symptoms                               | 1.37 (0.75-2.49)      | 0.301   |
| ≥2 sites of EN involvement (incl. BM/PB) | 3.00 (1.63-5.54)      | <0.001  |
| Treatment modifications:                 |                       |         |
| Frontline etoposide                      | 1.26 (0.70-2.28)      | 0.446   |
| Frontline anthracycline                  | 4.71 (1.71-12.96)     | 0.003   |
| HCT in CR1                               | 0.38 (0.17-0.85)      | 0.018   |
| CNS Prophylaxis                          | 1.10 (0.50-2.42)      | 0.813   |

Abbreviations: ALCL, anaplastic large cell lymphoma; SPTCL, subcutaneous panniculitis-like T-cell lymphoma; PCGD-TCL, primary cutaneous gamma-delta T-cell lymphoma; EATL, enteropathy-associated T-cell lymphoma; MEITL, monomorphic epitheliotropic intestinal T-cell lymphoma; PTCL, NOS, peripheral T-cell lymphoma, not otherwise specified; LDH, lactate dehydrogenase; EN, extranodal; BM/PB, bone marrow/peripheral blood

**Supplementary Table S8. Multivariate analysis of treatment modifications for high-risk training set patients (N=55).**

| <b>Variable</b>                          | <b>Hazard Ratio (95% CI)</b> | <b>P-Value</b> |
|------------------------------------------|------------------------------|----------------|
| MTNKN Histology:                         |                              |                |
| PTCL, NOS                                | 4.27 (1.29-14.09)            | 0.017          |
| ALCL, ALK+                               | No patients                  |                |
| EATL (includes EATL and MEITL)           | 2.50 (0.37-17.10)            | 0.350          |
| SPTCL (includes SPTCL and PCGD-TCL)      | No patients                  |                |
| Elevated LDH                             | 0.62 (0.21-1.80)             | 0.380          |
| Stage ≥III                               | 0.58 (0.12-2.84)             | 0.501          |
| B-symptoms                               | 3.17 (1.04-9.64)             | 0.042          |
| ≥2 sites of EN involvement (incl. BM/PB) | 4.05 (1.13-14.50)            | 0.032          |
| Treatment modifications:                 |                              |                |
| Frontline etoposide                      | 0.46 (0.19-1.11)             | 0.085          |
| Frontline anthracycline                  | 3.56 (0.97-13.08)            | 0.056          |
| HCT in CR1                               | 0.36 (0.10-1.28)             | 0.113          |
| CNS Prophylaxis                          | 0.52 (0.18-1.55)             | 0.243          |

Abbreviations: ALCL, anaplastic large cell lymphoma; SPTCL, subcutaneous panniculitis-like T-cell lymphoma; PCGD-TCL, primary cutaneous gamma-delta T-cell lymphoma; EATL, enteropathy-associated T-cell lymphoma; MEITL, monomorphic epitheliotropic intestinal T-cell lymphoma; PTCL, NOS, peripheral T-cell lymphoma, not otherwise specified; LDH, lactate dehydrogenase; EN, extranodal; BM/PB, bone marrow/peripheral blood

**Supplementary Table S9. Multivariate analysis of treatment modifications for training set patients who had CR1 after completion of frontline therapy (N=110).**

| Variable                                 | Hazard Ratio (95% CI)               | P-Value |
|------------------------------------------|-------------------------------------|---------|
| MTNKN Histology:                         |                                     |         |
| PTCL, NOS                                | 3.95 (1.48 - 10.53)                 | 0.006   |
| ALCL, ALK+                               | No estimate due to model separation |         |
| EATL (includes EATL and MEITL)           | 13.11 (1.22 - 141.30)               | 0.034   |
| SPTCL (includes SPTCL and PCGD-TCL)      | No estimate due to model separation |         |
| Elevated LDH                             | 0.90 (0.37 - 2.18)                  | 0.815   |
| Stage ≥III                               | 4.47 (0.93 - 21.59)                 | 0.062   |
| B-symptoms                               | 1.95 (0.86 - 4.45)                  | 0.112   |
| ≥2 sites of EN involvement (incl. BM/PB) | 2.13 (0.80 - 5.67)                  | 0.128   |
| Treatment modifications:                 |                                     |         |
| Frontline etoposide                      | 1.87 (0.79 - 4.41)                  | 0.155   |
| Frontline anthracycline                  | 2.64 (0.58 - 12.02)                 | 0.208   |
| HCT in CR1                               | 0.37 (0.14 - 1.01)                  | 0.051   |
| CNS Prophylaxis                          | 2.30 (0.66 - 8.06)                  | 0.191   |

Abbreviations: ALCL, anaplastic large cell lymphoma; SPTCL, subcutaneous panniculitis-like T-cell lymphoma; PCGD-TCL, primary cutaneous gamma-delta T-cell lymphoma; EATL, enteropathy-associated T-cell lymphoma; MEITL, monomorphic epitheliotropic intestinal T-cell lymphoma; PTCL, NOS, peripheral T-cell lymphoma, not otherwise specified; LDH, lactate dehydrogenase; EN, extranodal; BM/PB, bone marrow/peripheral blood

**Supplementary Table S10. Multivariate analysis of treatment modifications for high-risk training set patients who had CR1 after completion of frontline therapy (N=23).**

| <b>Variable</b>                          | <b>Hazard Ratio (95% CI)</b>          | <b>P-Value</b> |
|------------------------------------------|---------------------------------------|----------------|
| MTNKN Histology:                         |                                       |                |
| PTCL, NOS                                | 3.88 (0.49 - 30.58)                   | 0.199          |
| ALCL, ALK+                               | No patients                           |                |
| EATL (includes EATL and MEITL)           | No estimate due to model collinearity |                |
| SPTCL (includes SPTCL and PCGD-TCL)      | No patients                           |                |
| Elevated LDH                             | 0.54 (0.07 - 4.27)                    | 0.560          |
| Stage ≥III                               | 0.45 (0.01 - 26.53)                   | 0.699          |
| B-symptoms                               | 1.95 (0.21 - 18.39)                   | 0.559          |
| ≥2 sites of EN involvement (incl. BM/PB) | 2.33 (0.17 - 31.80)                   | 0.526          |
| Treatment modifications:                 |                                       |                |
| Frontline etoposide                      | 0.77 (0.14 - 4.08)                    | 0.756          |
| Frontline anthracycline                  | 1.49 (0.07 - 33.21)                   | 0.800          |
| HCT in CR1                               | 0.25 (0.02 - 2.82)                    | 0.262          |
| CNS Prophylaxis                          | 1.40 (0.20 - 9.93)                    | 0.736          |

Abbreviations: ALCL, anaplastic large cell lymphoma; SPTCL, subcutaneous panniculitis-like T-cell lymphoma; PCGD-TCL, primary cutaneous gamma-delta T-cell lymphoma; EATL, enteropathy-associated T-cell lymphoma; MEITL, monomorphic epitheliotropic intestinal T-cell lymphoma; PTCL, NOS, peripheral T-cell lymphoma, not otherwise specified; LDH, lactate dehydrogenase; EN, extranodal; BM/PB, bone marrow/peripheral blood
